# Supplementary material for: Flood Risk in a Range of Spatial Perspectives – from Global to Local
Source: Copernicus journal article supplement (doi:10.5194/nhess-2018-336), 2018-12-04
Supplement: Supplementary file [file nhess-2018-336-AC2-supplement.pdf]

1 **Flood Risk in a Range of Spatial Perspectives—from Global to Local**

2

3 Zbigniew W Kundzewicz<sup>1,2</sup>, Buda Su<sup>1,3</sup>, Yanjun Wang<sup>1</sup>, Guojie Wang<sup>1</sup>, Guofu Wang<sup>3</sup>,

4 Jinlong Huang<sup>1</sup>, Tong Jiang\*<sup>1,3</sup>

5 <sup>1</sup> Collaborative Innovation Center on Forecast and Evaluation of Meteorological

6 Disasters/Institute for Disaster Risk Management (iDRM), Nanjing University of Information

7 Science and Technology (NUIST), Nanjing, China

8 <sup>2</sup>Institute for Agricultural and Forest Environment, Polish Academy of Sciences, Poznan,

9 Poland

10 <sup>3</sup>National Climate Center, China Meteorological Administration, Beijing, China

11

12

13 **Corresponding author:**

14 Prof. Dr. Tong Jiang

15 Collaborative Innovation Center on Forecast and Evaluation of Meteorological Disasters/

16 Institute for Disaster Risk Management (iDRM), Nanjing University of Information Science

17 and Technology (NUIST), Nanjing, China

18

19

20 **Abstract**

21 The present paper examines flood risk (composed of hazard, exposure and vulnerability) in a

22 range of spatial perspectives – from the global to the local scale. It deals with observed records,

23 noting that flood damage has been increasing. It also tackles projections for the future, related

24 to flood hazard and flood losses. There are multiple factors driving flood hazard and flood risk

25 and there is a considerable uncertainty in our assessments, and particularly in projections for

26 the future. Further, this paper analyses options for flood risk reduction in several spatial

27 dimensions, from global framework to regional to local scales. It is necessary to continue

28 examination of the updated records of flood-related indices, trying to search for changes that

29 influence flood hazard and flood risk in river basins.

30

31 **Key words:** flood risk; flood hazard; flood risk reduction; global scale; regional scale; local

32 scale

33

34 **1. Introduction**

35

36 River flooding is a major natural disaster, manifesting itself at a range of spatial and temporal  
37 scales – from floods on large international rivers conveying huge masses of water (cubic  
38 kilometres) lasting over weeks or months to, potentially violent, destructive and killing,  
39 inundations in small, often urban, basins, lasting hours. It is estimated that, globally, floods  
40 constitute 43% of the total number of natural disasters and 47% of all weather-related disasters,  
41 affecting 2.3 billion people in 1995-2015, with the total damage of the order of 662 billion US\$.  
42 About 800 million people worldwide are currently living in flood-prone areas and about 70  
43 million of those people are, on average, exposed to floods each year (UNISDR, 2015).

44 The nature of disastrous floods seems to have changed, in recent decades, with increasing  
45 frequency and amplitude of heavy precipitation, flash and urban floods, as well as acute riverine  
46 and coastal flooding. Urbanization and sealing of ground surface have significantly increased  
47 surface water runoff in many areas. In some countries, recurrent flooding of crop land has taken  
48 a heavy toll in terms of lost agricultural production, food shortages, interrupted food supplies  
49 and under-nutrition. However, some deleterious impacts of floods are preventable or at least  
50 can be reduced, because of the opportunity of primary prevention through existing, and - in  
51 many places – affordable, technologies such as early warning systems and some flood defenses,  
52 while awareness raising and education can also be effective in protecting people from adverse  
53 impact of floods.

54 The spatial perspective on floods ranges from a global view by multi-national  
55 stakeholders, international organizations, reinsurance institutions, and think-tanks, interested in  
56 global affairs to regional (group of countries, river basins which cross national borders, where  
57 40% of global population live and where trans-boundary water issues should be addressed),  
58 national, and sub-national (river basins) scales. The local point of view is, for instance, the one  
59 of a family of a person who lost life in the flood, of a family that lost their house or workplace  
60 in the flood, or of persons responsible for local flood protection. The local scale pertains to the  
61 locality and community in flood-prone area, where flood damage incurred and/or where flood  
62 risk reduction measure has to be implemented. The global consideration may include  
63 aggregation of observation records, model-based projections, as well as international policies  
64 aimed at flood risk reduction.

65 In the present paper, reviewing flood risk in a range of spatial perspectives (from global to  
66 local), we start from examination of observed records, noting that flood damage has been  
67 increasing. Further, we discuss projections for the future – flood hazard and flood losses, and

68 then review flood-risk reduction strategies, starting from the global framework to regional to  
69 local.

70

## 71 **2. Observed records – flood damage has been increasing**

72

73 European Academies’ Science Advisory Council (see EASAC, 2018), presented the trends in  
74 the number of different types of natural catastrophes worldwide in 1980–2016 (with 1980 levels  
75 set at 100%), based on the data from MunichRe NatCatSERVICE. The number of hydrological  
76 events (floods and mass movements) has increased much stronger than the number of  
77 geophysical, meteorological and climatic events. The number of hydrological events in an  
78 average year has now more than quadrupled since 1980 (exceeds 500% in some years). Global  
79 damage caused by “hydrological events”, after Munich Re, has been growing, albeit with strong  
80 inter-annual variability (Fig. 1). The named hurricanes, such as the most costly three that hit N  
81 America in less than two months: Harvey in August 2017, as well as Irma and Maria (September  
82 2017) are counted as “meteorological events” even if the vast majority of the total damage  
83 (appr. 95 billion US\$) caused by Hurricane Harvey was related to flooding. Hurricane Harvey  
84 that inundated the city of Houston, Texas, USA, dropped record levels of rain on the city. If the  
85 damage caused by flooding related to Harvey were counted in Fig. 1, the year 2017 would likely  
86 be the outstanding one, with highest flood damage ever.

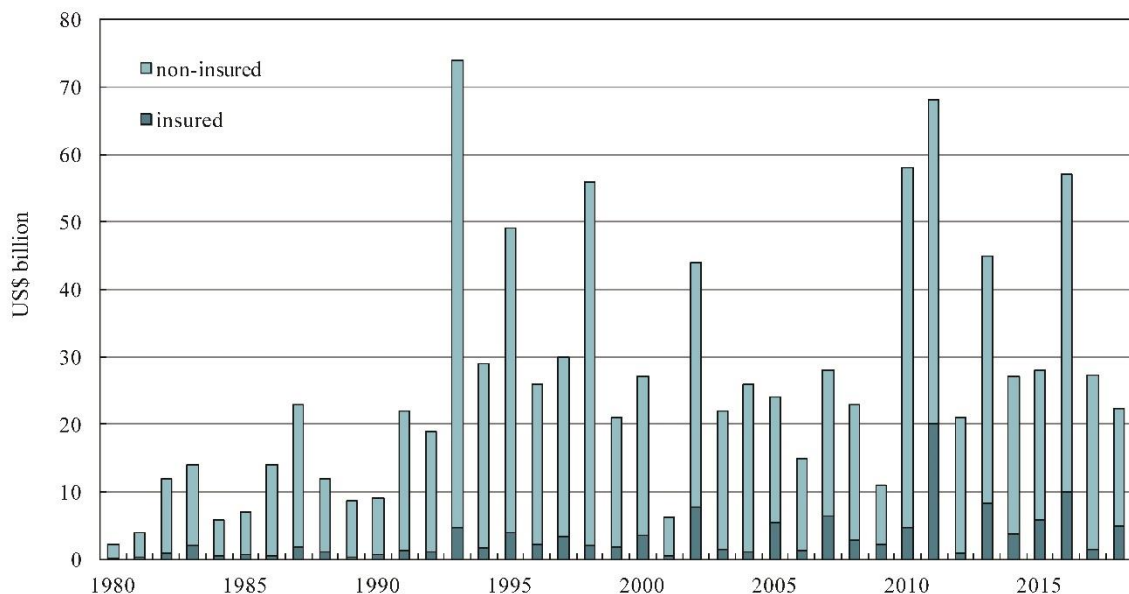

87

88 **Fig. 1** Global damage by “hydrological events”, in billions US\$ (Source: Munich Re  
89 NatCatSERVICE).

90

91 Flood risk can be assumed to depend on flood hazard, flood exposure and flood  
 92 vulnerability, which, in turn, are driven by a complex interplay of climate system, terrestrial  
 93 and hydrological system, as well as the socio-economic system (Fig. 2). Kundzewicz et al.  
 94 (2014) indicated that increasing exposure of population and assets has been primarily  
 95 responsible for the recent increase in flood losses.

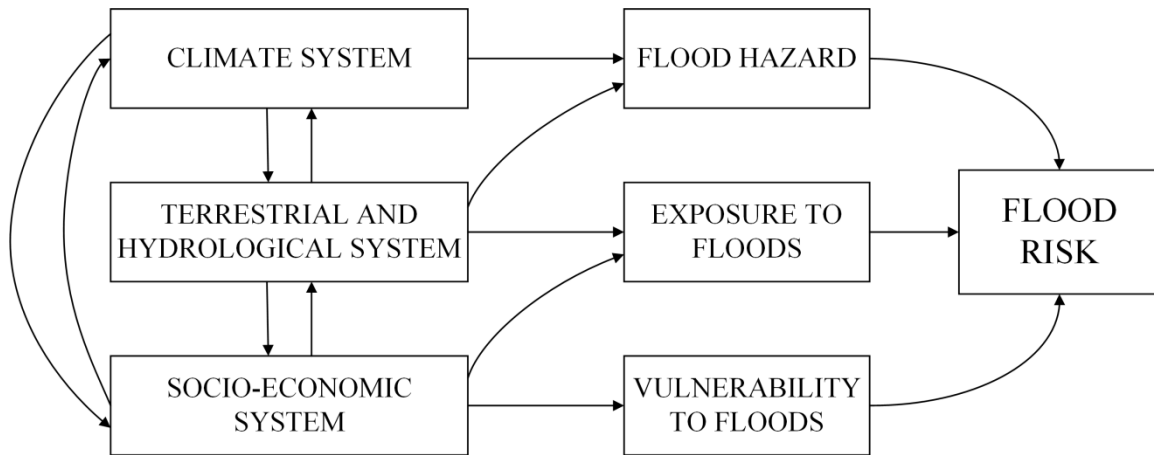

96  
97

98 **Fig. 2** Conceptual sketch of components of flood risk and its drivers (after: Kundzewicz et al.,  
 99 2017a, modified).

100

101 Economic losses in monetary units (yet, adjusted for inflation and PPP, i.e. purchase power  
 102 parity) caused by floods have been on the rise at any spatial scale. They are higher, in absolute  
 103 terms, in industrialized countries, while relative economic losses expressed as a proportion of  
 104 GDP and fatality rates are higher in less developed countries. This has grave security  
 105 implications. This observation holds for natural disasters in general. From 1970 to 2008, over  
 106 95% of natural-disaster-related deaths occurred in developing countries (Field et al., 2012).

107 Typically, disaster losses associated with hydrological extremes can be well buffered in  
 108 high-income countries (accounting less than 0.1% of GDP), while being much higher,  
 109 considerably exceeding 1% of GDP in small exposed and less developed countries (Field et al.,  
 110 2012).

111 Several factors may explain a perceived increase in flood risk:

- 112 • higher frequency and/or intensity of flood events;
- 113 • increased exposure of population and assets;
- 114 • increase of property value;
- 115 • generally, degraded awareness about natural risks, due to less natural lifestyle;
- 116 • increased vulnerability; and – not least
- 117 • improved and expanded reporting of disasters (sometimes called CNN effect).

118 There are countries in the world (see Kundzewicz et al., 2014), where more than 10% of  
 119 the population and/or more than 10% of the Gross Domestic Product (GDP) were exposed to  
 120 floods in an average year. In absolute terms, the highest number of people exposed was in India  
 121 and Bangladesh (over 10 million each), then in China, Vietnam and Cambodia, while the  
 122 highest mass of GDP exposed was in the USA and China (over 10 billion US\$ per year in each  
 123 country), while in India and Bangladesh, it was nearly 10 billion US\$. In relative terms, the  
 124 highest percentage of people exposed was in Bangladesh and Cambodia (each, over 10% of the  
 125 total population), then in Vietnam, while the highest relative share of economy exposed to  
 126 floods was estimated in Cambodia and Bangladesh (over 10% in each country), then in  
 127 Vietnam.

128 Dartmouth Floods Observatory (<http://floodobservatory.colorado.edu/>) has been  
 129 compiling information about large floods, worldwide, since 1985. A short list of most deadly  
 130 floods (including coastal surges), after the Dartmouth Floods Observatory is presented in Table  
 131 1. Among the main causes of the most destructive floods (with more than 1000 fatalities per  
 132 event) were: tropical and extra-tropical cyclones, monsoonal rains, tropical storms, torrential  
 133 rains, heavy rains, tsunamis, coastal surges, typhoons. Floods with heavy human toll were  
 134 recorded in many locations in: Asia (India, China, Bangladesh, Philippines, Afghanistan,  
 135 Pakistan, Japan, Burma), Central and South Americas (Honduras, Venezuela, Dominican  
 136 Republic, Haiti, Salvador, Nicaragua, Costa Rica) and Africa (Tanzania and Sudan).

137

138 **Table 1.** Six most deadly floods (including coastal surges), worldwide since 1985.

139 Information from Dartmouth Floods Observatory

| Countries           | Flood beginning | Flood end  | Dead [thousand] | Main cause            |
|---------------------|-----------------|------------|-----------------|-----------------------|
| Thailand            | 26.12.2004      | 29.12.2004 | 160             | Coastal surge         |
| Bangladesh          | 29.04.1991      | 10.05.1991 | 138             | Tropical cyclone      |
| Burma               | 03.05.2008      | 25.05.2008 | 100             | Tropical cyclone      |
| Venezuela, Colombia | 15.12.1999      | 20.12.1999 | 20              | Brief torrential rain |
| Honduras, Panama    | 24.10.1998      | 05.11.1998 | 11              | Brief torrential rain |
| India               | 29.10.1999      | 12.11.1999 | 9.8             | Tropical cyclone      |

140

141 Frequency and intensity of heavy precipitation have grown in many, but not all, areas of  
 142 the globe. However, no gauge-based evidence has been identified so far for a clear, widespread,

143 observed change in the magnitude and/or frequency of river floods (see Kundzewicz et al.,  
144 2005). Lins and Slack (1999) found that, hydrologically, the conterminous U.S. had been  
145 getting wetter, but less extreme. Later, they confirmed the pattern of increasing discharge in the  
146 low to moderate range of river flows, without a concomitant increase in flooding (Lins and  
147 Slack, 2005), detecting relatively few trends in the annual maximum flow. This pattern was  
148 most pronounced in the central two-thirds of the U.S. and to a lesser extent in the eastern coastal  
149 regions and in the Great Basin. Hodgkins et al. (2017) examined climate-driven variability in  
150 the occurrence of major floods across North America and Europe, in minimally altered  
151 catchments, finding that the number of significant trends was approximately equal to the  
152 number expected due to chance alone. Shaw and Riha (2011) studied three watersheds in  
153 different physiographic regions of New York State, USA and concluded that 20% or less of  
154 annual maximum streamflows are associated with the annual maximum rainfall events, another  
155 20% - with the annual maximum snowmelt events, while 60% - with moderate rainfall amounts  
156 and very wet soil conditions. Kundzewicz et al. (2018c) noted that it has not been possible to  
157 find ubiquitous flood hazard changes in observation records in Europe, so far. However, they  
158 detected an increasing trend in the number of large floods, even if the year-to-year, as well as  
159 the decadal, variabilities are strong. Indeed, temporal changes in the occurrence of major floods  
160 in many regions can be dominated by natural variability rather than by long-term trends. It is  
161 possible that temporally-varying connections exist between indices of climate variability and  
162 variability of the likelihood of destructive abundance of water.

163 Blöschl et al. (2017) found climate-induced patterns of change in observed flood timing  
164 in Europe, at the continental scale. They detected earlier spring snowmelt floods throughout NE  
165 Europe (warming-driven change); later winter floods around the North Sea and part of the  
166 Mediterranean coast (related to polar warming) and earlier winter floods in W Europe  
167 (reflecting advancement of soil moisture maxima). In contrast, Lins and Slack (2005) detected  
168 no systematic shift in the timing of the maximum flow in any US region on a monthly time  
169 scale.

170

### 171 **3. Projections for the future – flood hazard and flood damage**

172

173 Climate projections show ubiquitous warming for all seasons and most models project increase  
174 in intense precipitation. Seneviratne et al. (2012) presented regional projections of 20-year 24h  
175 precipitation, noting increases over virtually all regions of the Globe.

176 There have been several global studies of model-based projections of flood hazard, starting  
 177 from Milly et al. (2002), who covered selected basins worldwide, and Hirabayashi et al. (2008),  
 178 who covered the global scale. It is worthwhile to compare four more recent papers, published  
 179 since 2013 by Hirabayashi et al. (2013), Dankers et al. (2014), Arnell and Gosling (2014) and  
 180 Giuntoli et al. (2015). Table 2 presents assumptions made in the global projection endeavors  
 181 that considerably differ among studies (there are also slightly different reference periods).

182

183 **Table 2** Assumptions made in model-based global flood-hazard projection studies.

| Paper                               | Number of<br>climate<br>model<br>scenarios | Number of<br>hydrological<br>models | Variable of<br>interest           | Time<br>horizon of<br>concern | Emission<br>scenario |
|-------------------------------------|--------------------------------------------|-------------------------------------|-----------------------------------|-------------------------------|----------------------|
| Arnell and<br>Gosling (2014)        | 21 GCMs                                    | 1: Mac-PDM.09                       | Q100                              | 2050s                         | SRES<br>A1B          |
| Dankers <i>et al.</i><br>(2014)     | 5 GCMs                                     | 9 GHMs                              | Q30                               | 2070-2099                     | RCP8.5               |
| Giuntoli <i>et al.</i><br>(2015)    | 5 GCMs                                     | 6 GHMs                              | Frequency<br>of high flow<br>days | 2066-2099                     | RCP8.5               |
| Hirabayashi <i>et al.</i><br>(2013) | 11 GCMs                                    | 1 CaMa-Flood<br>model               | Q100                              | 2071-2100                     | RCP8.5               |

184

185 Projections by Hirabayashi et al. (2013) indicate that what used to be a 100-year flood in  
 186 the control period in many areas, is likely to occur much more frequently in the future, under  
 187 changed climate, with return period of 50 years and below. Hirabayashi et al. (2013) project  
 188 increase of hazard (Q100) in most of Asia (except for Western Asia) and in particular –  
 189 eastwards of 80°E. They also project flood hazard to increase in Central Africa in latitude range  
 190 20°S-10°N and in Central and South America from 20°N to 40°S, also in the north of North  
 191 America and the East coast of the US. For most of Europe, decrease of flood hazard is projected.  
 192 Results of Dankers et al. (2014) referring to a different index, Q30 (30-year 5-day peak flow),  
 193 are broadly similar to those reported by Hirabayashi et al. (2013) as to the direction of change,  
 194 except for a large area of decrease of hazard in South America. In turn, Giuntoli et al. (2015)  
 195 project more frequent days with high river flow conditions over much of the north, from 50°N

196 northwards. However, over most of the area of continents, they projected rather small changes,  
197 with absolute value less than 5% (i.e. from -5% to +5%).

198 Studies of large-scale projections of changes in flood hazard illustrate a considerable  
199 degree of uncertainty. There is no wonder, as projections were determined for different  
200 assumptions (cf. Table 2). They may differ with respect to (see Kundzewicz et al., 2018a,b):

- 201 - greenhouse gas emissions scenarios (SRES, RCP);
- 202 - driving climate models: general circulation models (GCMs), and regional  
203 climate models (RCMs);
- 204 - downscaling techniques and bias correction methods;
- 205 - performance of large-scale hydrological models, i.e. global hydrological models  
206 (GHMs) and regional hydrological models (RHMs);
- 207 - climate and hydrological model resolution;
- 208 - time horizons of future projections;
- 209 - reference (historic) intervals;
- 210 - return period (recurrence interval) of concern;
- 211 - low-temperature effects, e.g. snow and ice component in models;
- 212 - general problems related to simulation of extremes and extreme value techniques  
213 applied to time series that are not long enough.

214 The implications of the changing flood hazard to human society depend on the size of the  
215 population at risk of flooding. Under assumption of a fixed population (at the level of scenario  
216 from 2005), it was projected that annual global flood exposure would increase by about 4±3  
217 times (under RCP2.6), 7±5 times (RCP4.5), 7±6 times (RCP6.0) and 14±10 times (RCP8.5)  
218 from 20th to 21st century (Hirabayashi et al., 2013). However, such results have to be  
219 interpreted with caution, especially considering changing adaptation and risk reduction  
220 capacity.

221 Where both rain-floods and snow-floods (as well as ice-jam floods) can influence  
222 projections, relevant processes and different mechanisms have to be examined, for present and  
223 future conditions.

224 In addition, future flood risk in coastal zones will increase due to the sea level rise  
225 (Paprotny and Terefenko, 2017). As projected by Vousdoukas et al. (2018), taking into account  
226 both the socioeconomic pathways and climate change but in absence of further investments in  
227 adaptation, annual damage caused by coastal flooding in Europe will increase from current 1.25  
228 € billion to 93 - 961€ billion in the end of 21st century, and the exposed population will increase  
229 from the current level of 0.1 million to 1.52 - 3.65 million.



230

231 **4. Flood risk reduction – global framework**

232 Efforts on flood risk reduction are embedded in the general global framework, including the  
233 major documents – Hyogo Framework for Action and Sendai Framework for Disaster Risk  
234 Reduction.

235 “Tragedies will continue to be repeated if we do not address water and disaster issues at  
236 all levels,” stated Dr. Han Seung-soo, the founding chair of the High-Level Experts and  
237 Leaders’ Panel on Water and Disaster (HELP) ( <https://www.unisdr.org/archive/58108>), while  
238 the UN Special Representative for Disaster Risk Reduction, Ms. Mami Mizutori, remarked that  
239 floods which now account for half of all weather-related disasters, highlight how disaster risk  
240 reduction is both a long-term development issue and a necessary strategy to prevent disasters  
241 and save lives in the short to medium term.

242 The World Conference on Disaster Reduction held in Hyogo, Japan, in 2005, promoting a  
243 strategic and systematic approach to reducing vulnerabilities and risks to hazards, adopted the  
244 Framework for Action 2005-2015, identifying ways of building the resilience of nations and  
245 communities to disasters (UNISDR, 2007).

246 Disaster loss has been on the rise with grave adverse consequences for the survival, dignity  
247 and livelihood of people, particularly of the poor, and for the hard-won development gains.  
248 Disaster risk is increasingly of global concern and a flood occurrence in one region can have an  
249 impact on risk in another one (e.g. via broken production links that manifested themselves  
250 during and after the 2011 Thailand flood). The Hyogo Framework identified specific gaps and  
251 challenges in the following main areas: governance: organizational, legal and policy  
252 frameworks; risk identification, assessment, monitoring and early warning; knowledge  
253 management and education; reducing underlying risk factors; and preparedness for effective  
254 response and recovery.

255 Disaster risk reduction can be regarded as a cross-cutting issue in the realm of sustainable  
256 development and therefore an important element for the achievement of internationally agreed  
257 Millennium Development Goals.

258 The global plan for reducing disaster losses, the Sendai Framework for Disaster Risk  
259 Reduction, 2015-2030, was adopted by UN Member States in 2015, at the Third UN World  
260 Conference on Disaster Risk Reduction in Sendai, Japan  
261 (<https://www.unisdr.org/we/coordinate/sendai-framework>). It is a voluntary, non-binding,  
262 agreement aimed at a substantial reduction of disaster risk and losses in lives, livelihoods and  
263 health and in the assets. It emphasizes the importance of risk-informed investment in critical

264 infrastructure, including water facilities, to avoid the creation of new risk. Disaster risk  
265 reduction and prevention should be integrated in long-term national planning and education on  
266 disaster risk must be advanced. Recognizing the State’s primary role to reduce disaster risk but  
267 also noting that responsibility should be shared with stakeholders, the Sendai Framework  
268 agreement, aiming to make a difference for poverty, health and resilience is the major document  
269 of the recent development agenda, embracing seven targets and four priorities for action.

270 The global targets include substantial reduction of mortality in flood disasters and the  
271 number of affected people, reduction of direct economic loss and damage to critical  
272 infrastructure as well as disruption of basic services (among them health and educational  
273 facilities), including through enhancing resilience (recovery). They also include work on  
274 national and local disaster risk reduction strategies, on international cooperation and on  
275 increasing the availability of and access to early warning systems (also dedicated to multiple  
276 hazards) and disaster risk information and assessments. Timelines for achieving these targets  
277 and reference intervals for measuring the progress were defined.

278 The priorities for action refer to understanding of disaster risk in its dimensions of  
279 vulnerability, capacity, exposure of persons and assets, hazard characteristics and the  
280 environment. Such knowledge can be used for risk assessment, as well as to various flood risk  
281 reduction strategies - prevention, mitigation, preparedness and response, recovery and  
282 rehabilitation (see Dieperink et al., 2016, Driessen et al., 2016, Hegger et al., 2016 and  
283 Kundzewicz et al., 2018b). Strengthening disaster risk governance at a range of levels (national,  
284 regional and global) is another priority. Also investing in disaster risk reduction to enhance the  
285 economic, social, health and cultural resilience of persons, communities, countries and their  
286 assets, as well as the environment is an identified priority. So is also enhancing disaster  
287 preparedness for effective response and “Building Back Better”. Disaster risk reduction has to  
288 be integrated into sustainable development measures.

289 Willner et al. (2018) computed the required increase in flood protection, worldwide for  
290 subnational administrative units, in order to keep the historic high-end fluvial flood risk in the  
291 next 25 years. They found that most of the United States, Central Europe, and Northeast and  
292 West Africa, as well as large parts of India and Indonesia, require strong adaptation effort. For  
293 example, according to the results of this paper, flood protection needs to at least double over  
294 more than half of the United States, within the next two decades.

295

## 296 **5. Flood risk reduction – from regional to local**

297 There is no doubt that flood risk has grown in many places and is likely to grow further in the  
298 future, due to a combination of anthropogenic and climatic factors. Intense precipitation grows  
299 in the warming climate. However, reliable and detailed quantification of aggregate flood  
300 statistics is very difficult to obtain for the past-to-present and is virtually impossible to obtain  
301 for the future. Nevertheless, despite of the lack of reliable projections, flood risk reduction  
302 endeavors have been carried out at a range of scales, from regional (multi-national) to national,  
303 sub-national and local.

304 At the sub-continental scale, European Union (EU) passed a dedicated Directive  
305 2007/60/EC on the assessment and management of flood risks (EU 2007), that required all EU  
306 Member States (28 at present) to identify areas at risk from flooding, to map the flood extent as  
307 well as assets and humans at risk in these areas and to take adequate and coordinated measures  
308 to reduce this flood risk. This Directive also reinforces the rights of the public to access  
309 information and to participate in the planning process. The Directive aims to reduce and manage  
310 the risks that floods pose to human health, economic activity, environment, and cultural  
311 heritage. The Directive required EU Member States to establish flood risk management plans  
312 focused on prevention, protection and preparedness by 2015.

313 Presence of people and wealth in flood prone areas can be regarded as an illness. One can  
314 prevent the risk, by keeping the destructive water away from people and proceeding with flood  
315 defenses. This is the curation of the symptoms of the illness. One can also keep people away  
316 from the destructive water by way of zoning and ban on floodplain development. This is  
317 curation of the source of the illness. But, it is also necessary to prepare to living with floods.  
318 This embraces flood mitigation – keeping water where it falls, flood preparation – forecasting,  
319 warning, as well as preparation for evacuation and the post-flood recovery (see Dieperink et al.,  
320 2016; Driessen et al., 2016; Hegger et al., 2016; Nieland and Mushtaq, 2016, Kundzewicz et  
321 al., 2018).

322 Since it is naïve to expect availability of trustworthy quantitative projections of future  
323 flood hazard (as some practitioners clearly do), in order to reduce flood risk, one should focus  
324 attention on identification of existing risk and vulnerability hotspots and improve the situation  
325 in areas where such hotspots occur (Kundzewicz et al., 2017b).

326 The prerequisite for flood risk reduction is to examine long time series of reliable records  
327 on flood-related information. Koç and Thielen (2018) carried out a comparative national  
328 review of information on floods in Turkey from three sources: Turkey Disaster Database  
329 (TABB), the Emergency Events Database (EM-DAT), and the Global Active Archive of Large  
330 Flood Events—Dartmouth Flood Observatory. They found large mismatches in the flood data

331 for Turkey, related to the number of events, the number of affected people and the economic  
332 loss.

333 Flood protection, i.e. adaptation to huge variability of discharge, has been developed in  
334 China for four millennia, since the quasi-legendary Emperor Yu, who established the Xia  
335 dynasty, marking the beginning of Chinese civilization. He succeeded in taming a long-lasting  
336 and disastrous flood in the Yellow River basin by dredging and channelling the rivers to drain  
337 the floodwaters and

338 Flood protection has always been important in China, where hundreds of millions of  
339 people live in river valleys. Structural measures, both dikes and dams of different sizes, have a  
340 very long tradition in China (a term “hydraulic civilization” was coined by Wittfogel, 1956)  
341 and continue to play a vital role in flood prevention also today, and in the foreseeable future.  
342 The multi-objective, massive Three Gorges Dam on the River Yangtze, the world’s greatest  
343 engineering work, has flood protection as the principal objective. Many large reservoirs, also  
344 with flood protection as the main objective, have been built in China, with a total storage  
345 capacity in excess of  $0.5 \times 10^{12} \text{ m}^3$ , accounting for over one fifth of the total estimated annual  
346 runoff from the land areas (Guo et al., 2004). Typically, water storage reservoirs serve multiple  
347 purposes: flood control, hydropower, irrigation, water supply, navigation, etc. The total number  
348 of large dams has increased very strongly since 1960, when only five large dams (higher than  
349 100 m) existed in China. The number of large dams grew tenfold in 2000 (Xu et al., 2010). In  
350 the second half of the 20th century, more than 200 thousand kilometers of dikes have been  
351 strengthened for alleviating the impacts of floods in China (Zhang et al., 2002).

352 The level of expenditure on flood protection in China has grown considerably in recent  
353 decades. However, despite the massive efforts, it is getting abundantly clear that complete flood  
354 control is not possible. Even if there exist powerful levees along the rivers in China, they may  
355 not provide satisfactory protection of the riparians during large floods (see Kundzewicz and  
356 Xia, 2004). Increasingly, large flood damage has been recently occurring on medium- and  
357 small-size rivers. Hence, improvement of flood risk management is needed in the country and  
358 ambitious and vigorous attempts to improve flood preparedness have been already undertaken,  
359 by both structural (“hard”) and non-structural (“soft”) measures. The former refer to such  
360 defences as dikes, dams and flood control reservoirs, diversions, etc. The latter include  
361 implementing watershed management (source control), zoning; insurance; flood forecasting–  
362 warning system; and awareness raising (Surminski et al., 2015; Nieland and Mushtaq, 2016;  
363 Adelekan and Asiyebi, 2016). The coping capacities at a local level can influence the  
364 robustness of flood warning system (Daupras et al., 2015).

365 In many countries, flood protection is distributed among several agencies, hence effective  
366 cooperation and communication among federal, state and local stakeholders is essential. This  
367 is inherently difficult, but progress has been achieved in China in flood forecasting integration,  
368 data sharing and collaborative problem solving. The China Meteorological Administration  
369 (CMA) collects observations of precipitation and other meteorological variables and prepares  
370 precipitation forecasts. The Ministry of Water Resources (MWR) of China collects  
371 hydrological observations (e.g., of river levels and discharges) and is responsible for flood  
372 forecasting and dissemination of the forecast. River basin commissions in China (altogether –  
373 seven commissions, including the Yangtze River Basin Commission) are agencies of the MWR.  
374 The Flood Prevention Law of 2007 laid out principles and responsibilities for flood prevention  
375 planning in China. There is a national standard (GB50201-94) drafted by the Ministry of Water  
376 Resources and issued by the Ministry of Construction in 1994 dealing with flood return periods  
377 for different categories of location (Gemmer et al., 2011). In 2010, flood hazard mapping  
378 guidelines were published as a professional standard by the Ministry of Water Resources.

379 Gemmer et al. (2011) reviewed climate change adaptation in China, the National Climate  
380 Change Programme and China’s White Paper “China’s Policies and Actions for Addressing  
381 Climate Change”. All 34 provinces of China produced a climate change adaptation plan,  
382 including flood risk reduction.

383 It is a well founded observation that occurrence of a disastrous flood event in a country or  
384 a region improves awareness and triggers funding of relevant research and investment in flood  
385 risk reduction. In brief, people are expected to learn from floods. However, in their study of  
386 consequences of the destructive 2011 flood in Thailand, Marks and Thomalla (2017) noted that  
387 the government has only made minor efforts to reduce flood risk. The sociopolitical  
388 transformations needed to reduce system vulnerability have not occurred. The focus was on  
389 structural defenses - building floodwalls to reduce risk to large-scale enterprises, and this has  
390 redistributed risk to unprotected areas.

391

## 392 **6. Concluding remarks**

393 Many studies of flood hazard projections demonstrate the likely rise of flood hazard in the  
394 future. Plausible climate change scenarios indicate the possibility of increases in both the  
395 frequency and the magnitude of flooding events in many regions. Yet there has been no  
396 conclusive and general finding as to how climate change affects flood behaviour, in the light of  
397 data observed so far, except of some indications of regional changes in timing of floods  
398 observed in some areas, with increasing late autumn and winter floods (caused by rain) and less

399 ice-jam-related floods, e. g., in Europe. The natural variability in observation records is  
400 overwhelming.

401         The flood risk depends on a combination of anthropogenic and natural factors, such as  
402 climate, land use, as well as population density and wealth (hence – damage potential) in flood-  
403 risk areas and development of flood defenses. Owing to the growing population pressure,  
404 activities like deforestation, agricultural land expansion, urbanization (and increasing sealing  
405 of the ground surface), construction of roads, as well as reclamation of wetlands and lakes have  
406 been progressing. This has reduced the available water storage capacity in river basins,  
407 increased the value of the runoff coefficient, and aggravated flood hazard and flood risk. Flood  
408 potential has ubiquitously increased – there is simply more to lose.

409         There are multiple factors driving flood hazard and flood risk and there is a considerable  
410 uncertainty in our assessments, and in particular projections for the future. In many places flood  
411 risk is likely to grow, due to a combination of anthropogenic and climatic factors. However, in  
412 general, it is difficult to disentangle the climatic change component in maximum river flow or  
413 flood hazard records from strong natural variability and direct, man-made, environmental  
414 changes. There is a large difference between flood hazard projections obtained by using  
415 different scenarios and different models. Therefore, one should be careful with flat-rate  
416 statements on changes in flood hazard and flood risk, and on climate change impact in  
417 particular. The impact of climate forcing on flood risk is complex and depends on the flood  
418 generation mechanism. Indeed, higher and more intense precipitation has been already observed  
419 in many (but not all) areas of the Globe and this trend is expected to strengthen in the warmer  
420 world, directly impacting on flood risk. Therefore, common-sense changes to design rules,  
421 aimed at flood risk reduction, have been introduced in some countries of Europe, based more  
422 on precautionary principle rather than on robust science. The design flood was adjusted upward  
423 in light of projections for the warmer climate.

424         However, it is a robust statement that, in general, today's climate models are still not good  
425 enough at producing local climate extremes due to, *inter alia*, inadequate (coarse) resolution.  
426 There is hope that, with improving resolution, models will be able to grasp details of extreme  
427 events in a more accurate and reliable way (Kundzewicz and Schellnhuber, 2004).

428         It is necessary to continue examination of the updated records of flood-related indices,  
429 trying to search for changes that influence flood hazard and flood risk in river basins. Possibly,  
430 there have been and will continue to be changes in intense precipitation; changes in cyclone  
431 track; changes in land use; and changes in exposure and vulnerability. Early detection and  
432 attribution of changes at any spatial scale would be of vast practical importance.

433

## 434 **Acknowledgments**

435 This study was supported by National Key Research and Development Program of China  
436 MOST (2018FY10050001) and bilateral cooperation project between the Natural Science  
437 Foundation of China and the Pakistan Science Foundation (41661144027). The authors are  
438 thankful for the support by the High-level Talent Recruitment Program of the Nanjing  
439 University of Information Science and Technology (NUIST). Thanks are also due to Munich  
440 Re NatCatSERVICE for provision of global flood loss data.

441

## 442 **REFERENCES**

- 443 Adelekan, I. O. and Asiyanbi, A. P.: Flood risk perception in flood-affected communities in  
444 Lagos, Nigeria. *Natural Hazards*, 80, 445-469, 2016.
- 445 Arnell, N. W. and Gosling, S. N.: The impacts of climate change on river flood risk at the global  
446 scale, *Climatic Change*, 134, 387–401, doi:10.1007/s10584-014-1084-5, 2014.
- 447 Blöschl, G., Hall, J., Parajka, J., Perdigo, R. A. P., Merz, B., Arheimer, B., Aronica, G. T.,  
448 Bilibashi, A., Bonacci, O., Borga, M., Canjevac, I., Castellarin, A., Chirico, G. B., Claps,  
449 P., Fiala, K., Frolova, N., Gorbachova, L., Gul, A., Hannaford, J., Harrigan, S., Kireeva,  
450 M., Kiss, A., Kjeldsen, T. R., Kohnova S, Koskela JJ, Ledvinka O, Macdonald N,  
451 Mavrova-Guirguinova M, Mediero L, Merz R, Molnar P, Montanari A, Murphy C, Osuch  
452 M, Ovcharuk V, Radevski I, Rogger M, Salinas JL, Sauquet E, Šraj M, Szolgay J, Viglione  
453 A, Volpi E, Wilson D, Zaimi K. and Živkovic N.: Changing climate shifts timing of  
454 European floods, *Science* 357(6351), 588–590. <https://doi.org/10.1126/science.aan2506>,  
455 [2017](https://doi.org/10.1126/science.aan2506).
- 456 Dankers, R., Arnell, N. W., Clark, D. B., Falloon, P. D., Fekete, B. M., Gosling, S. N., Heinke,  
457 J., Kim, H., Masaki, Y., Satoh, Y., Stacke, T., Wada, Y., and Wisser, D.: First look at  
458 changes in flood hazard in the inter-sectoral impact model intercomparison project  
459 ensemble, *Proceedings of the National Academy of Sciences*, 111, 3257–3261,  
460 doi:10.1073/pnas.1302078110, 2014.
- 461 Daupras, F., Antoine, J. M., Becerra, S. and Peltier, A.: Analysis of the robustness of the French  
462 flood warning system: a study based on the 2009 flood of the Garonne River, *Natural  
463 Hazards*, 75, 215-241, 2015.
- 464 Dieperink. C., Hegger, D. L. T., Bakker, M. H. N., Kundzewicz, Z. W., Green, C. and  
465 Driessen, P. P. J.: Recurrent governance challenges in the implementation and alignment  
466 of flood risk management strategies: a review, *Water Resources Management*, 30, 4467-  
467 4481, doi: 10.1007/s11269-016-1491-7, 2016.
- 468 Driessen, P. P. J., Hegger, D. L. T., Bakker, M. H. N., Rijswick, H. F. M. W. V.  
469 and Kundzewicz, Z. W.: Toward more resilient flood risk governance, *Ecology and  
470 Society*, 21, 53, <https://doi.org/10.5751/ES-08921-210453>, 2016.
- 471 EASAC (European Academies' Science Advisory Council): Extreme weather events in Europe.  
472 Preparing for climate change adaptation: an update on EASAC's 2013 study,  
473 [https://easac.eu/fileadmin/PDF\\_s/reports\\_statements/Extreme\\_Weather/EASAC\\_Statem  
474 ent\\_Extreme\\_Weather\\_Events\\_March\\_2018\\_FINAL.pdf](https://easac.eu/fileadmin/PDF_s/reports_statements/Extreme_Weather/EASAC_Statement_Extreme_Weather_Events_March_2018_FINAL.pdf), 2018.

- 475 EU (European Union): Directive 2007/60/EC of the European parliament and of the council of  
 476 23 October 2007 on the assessment and management of flood risks, Official Journal of the  
 477 European Union, L288, 27–34, 2007.
- 478 Field, C. B., Barros, V., Stocker, T. F., Qin, D., Dokken, D. J., Ebi, K. L., Mastrandrea, M. D.,  
 479 Mach, K. J., Plattner, G. K., Allen, S. K., Tignor, M. and Midgley, P. M.: Managing the  
 480 risks of extreme events and disasters to advance climate change adaptation, Special Report  
 481 of Working Groups I and II of the Intergovernmental Panel on Climate Change (IPCC),  
 482 Cambridge, UK: Cambridge University Press, 2012.
- 483 Gemmer, M., Wilkes, A. and Vaucel, L. M.: Governing climate change adaptation in the EU  
 484 and China: An analysis of formal institutions, *Advances in Climate Change Research*, 2,  
 485 1-11, 2011.
- 486 Guo, S., Zhang, H., Chen, H., Peng, D., Liu, P. and Pang, B.: A reservoir flood forecasting and  
 487 control system for China, *Hydrological Sciences Journal*, 49, 959–972, 2004.
- 488 Giuntoli, I., Vidal, J. P., Prudhomme, C. and Hannah, D. M.: Future hydrological extremes:  
 489 the uncertainty from multiple global climate and global hydrological models, *Earth System*  
 490 *Dynamics*, 6, 267–285, doi:10.5194/esd-6-267-2015, 2015.
- 491 Hegger, D. L. T., Driessen, P.P.J., Wiering, M.A., Rijswick, H. F. M. W. V., Kundzewicz, P.,  
 492 Matczak, A., Crabbé, A., Raadgever, G. T., Bakker, M. H. N., Priest, S. J., Larrue, C., Ek,  
 493 K., Hegger, D., Driessen, P. P. J., Raadgever, T. and Priest, S.: Toward more flood  
 494 resilience: Is a diversification of flood risk management strategies the way forward?,  
 495 *Ecology and Society*, 21, 52-71, <https://doi.org/10.5751/ES-08854-210452>, 2016.
- 496 Hirabayashi, Y., Kanae, S., Emori, S., Oki, T. and Kimoto, M.: Global projections of changing  
 497 risks of floods and droughts in a changing climate, *Hydrological Sciences Journal*, 53,  
 498 754–772, doi:10.1623/hysj.53.4.754, 2008.
- 499 Hirabayashi, Y., Mahendran, R., Koirala, S., Konoshima, L., Yamazaki, D., Watanabe, S.,  
 500 Kim, H. and Kanae, S.: Global flood risk under climate change, *Nature Climate Change*,  
 501 3, 816–821, doi:10.1038/nclimate1911, 2013.
- 502 Hodgkins, G. A., Whitfield, P. H., Burn, D. H., Hannaford, J., Renard, B., Stahl, K., Fleig, A.  
 503 K., Madsen, H., Mediero, L., Korhonen, J., Murphy, C. and Wilson, D.: Climate-driven  
 504 variability in the occurrence of major floods across North America and Europe, *Journal of*  
 505 *Hydrology*, 552, 704-717, <https://doi.org/10.1016/j.jhydrol.2017.07.027>, 2017.
- 506 Koç, G. and Thielen, A. H.: The relevance of flood hazards and impacts in Turkey: What can  
 507 be learned from different disaster loss databases?, *Natural Hazards*, 91, 375–408, 2018.
- 508 Kundzewicz, Z. W. and Schellnhuber, H. J.: Floods in the IPCC TAR perspective, *Natural*  
 509 *Hazards*, 31, 111-128, 2004.
- 510 Kundzewicz, Z. W. and Xia, J.: Towards an improved flood preparedness system in China,  
 511 *Hydrological Sciences Journal*, 49, 941-944, 2004.
- 512 Kundzewicz, Z. W., Graczyk, D., Maurer, T., Pińskwar, I., Radziejewski, M., Svensson, C. and  
 513 Szwed, M.: Trend detection in river flow series: 1. Annual maximum flow, *Hydrological*  
 514 *Sciences Journal*, 50, 797–810, 2005.
- 515 Kundzewicz, Z. W., Kanae, S., Seneviratne, S. I., Handmer, J., Nicholls, N., Peduzzi, P.,  
 516 Mechler, R., Bouwer, L. M., Arnell, N., Mach, K., Muir-Wood, R., Brakenridge, G. R.,  
 517 Kron, W., Benito, G., Honda, Y., Takahashi, K. and Sherstyukov, B.: Flood risk and  
 518 climate change: global and regional perspectives, *Hydrological Sciences Journal*, 59, 1-28,  
 519 2014.



520 Kundzewicz, Z. W., Pińskwar, I. and Brakenridge, G. R.: Changes in river flood hazard in  
521 Europe: a review, *Hydrology Research*, 49, nh2017016, doi:10.2166/nh.2017.016, 2017a.

522 Kundzewicz, Z. W., Krysanova, V., Dankers, R., Hirabayashi, Y., Kanae, S., Hattermann, F.  
523 F., Huang, S., Milly, P. C. D., Stoffel, M., Driessen, P. P. J., Matczak, P., Quevauviller, P.  
524 and Schellnhuber, H. J.: Differences in flood hazard projections in Europe - their causes  
525 and consequences for decision making, *Hydrological Sciences Journal*, 62, 1-14, 2017b.

526 Kundzewicz, Z. W., Krysanova, V., Benestad, R. E., Hov, Ø., Piniewski, M. and Otto, I. M.:  
527 Uncertainty in climate change impacts on water resources, *Environmental Science &  
528 Policy*, 79, 1-8, 2018a.

529 Kundzewicz, Z. W., Hegger, D. L. T., Matczak, P. and Driessen, P. P. J.: Flood risk reduction:  
530 structural measures and diverse strategies, *PNAS* (December 4, 2018), 115(49), 12321–  
531 12325, 2018b.

532 Kundzewicz, Z. W., Pińskwar, I. and Brakenridge, G. R. (2018b) Changes in river flood hazard  
533 in Europe: a review, *Hydrology Research* 49(2): 294-302, doi: 10.2166/nh.2017.016280,  
534 2018c.

535 Lins, H. F. and Slack, J. R.: Streamflow trends in the United States, *Geoph. Res. Letters*, 26(2),  
536 227-230, 1999.

537 Lins, H. F. and Slack, J. R.: Seasonal and regional characteristics of U.S. streamflow trends in  
538 the United States from 1940 to 1999, *Phys. Geogr.*, 26(6), 489–501, 2005.

539 Marks, D. and Thomalla, F.: Responses to the 2011 floods in Central Thailand: Perpetuating  
540 the vulnerability of small and medium enterprises?, *Natural Hazards*, 87, 1147–1165, 2017.

541 Milly, P. C. D., Wetherald, R. T., Dunne, K. A. and Delworth, T. L.: Increasing risk of great  
542 floods in a changing climate, *Nature*, 415, 514-517, 2002.

543 Nieland, C. and Mushtaq, S.: The effectiveness and need for flash flood warning systems in a  
544 regional inland city in Australia, *Natural Hazards*, 80, 153-171, 2016.

545 Paprotny, D. and Terefenko, P.: New estimates of potential impacts of sea level rise and coastal  
546 floods in Poland, *Natural Hazards*, 85, 1249-1277, 2017.

547 Seneviratne, S. I., Nicholls, N., Easterling, D., Goodess, C., Kanae, S., Kossin, J., Luo, Y.,  
548 Marengo, J., McInnes, K., Rahimi, M., Reichstein, M., Sorteberg, A., Vera, C., Zhang, X.:  
549 Changes in climate extremes and their impacts on the natural physical environment. In:  
550 Field, C. B., et al. (eds) *Managing the risks of extreme events and disasters to advance  
551 climate change adaptation. A special report of working groups I and II of the  
552 Intergovernmental Panel on Climate Change (IPCC)*. Cambridge University Press,  
553 Cambridge, and New York, NY, 2012.

554 Shaw, S. B. and Riha, S. J.: Assessing possible changes in flood frequency due to climate  
555 change in mid-sized watersheds in New York State, USA, *Hydrol. Proc.*, 25(16), 2542-  
556 2550, 2011.

557 Surminski, S., Aerts, J. C. J. H., Botzen, W. J. W., Hudson, P., Mysiak, J. and Pérez-Blanco, C.  
558 D.: Reflections on the current debate on how to link flood insurance and disaster risk  
559 reduction in the European Union, *Natural Hazards*, 79, 1451-1479, 2015.

560 UNISDR (The United Nations Office for Disaster Risk Reduction): *Hyogo Framework for  
561 action 2005-2015: Building the resilience of nations and communities to disasters*,  
562 [https://www.unisdr.org/files/1037\\_hyogoframeworkforactionenglish.pdf](https://www.unisdr.org/files/1037_hyogoframeworkforactionenglish.pdf), 2007.

- 563 UNISDR (The United Nations Office for Disaster Risk Reduction): The human cost of weather-  
564 related disasters 1995-2015,  
565 [https://www.unisdr.org/files/46796\\_cop21weatherdisastersreport2015.pdf](https://www.unisdr.org/files/46796_cop21weatherdisastersreport2015.pdf), 2015.
- 566 Voudoukas, M. I., Mentaschi, L., Voukouvalas, E., Bianchi, A., Dottori, F. and Feyen, L.:  
567 Climatic and socioeconomic controls of future coastal flood risk in Europe, *Nature Climate*  
568 *Change*, 8, 776-780, 2018.
- 569 Willner, S. N., Levermann, A., Zhao, F. and Frieler, F.: Adaptation required to preserve future  
570 high-end river flood risk at present levels, *Science Advances*, 4, eaao1914, doi:  
571 10.1126/sciadv.aao1914, 2018.
- 572 Wittfogel, K. A.: *The hydraulic civilization: Man's role in changing the Earth*, University of  
573 Chicago Press, Chicago, IL, USA, 1956.
- 574 Xu, K., Milliman, J. D. and Xu, H.: Temporal trend of precipitation and runoff in major Chinese  
575 Rivers since 1951, *Glob. Planet. Change*, 73, 219-232, 2010.
- 576 Zhang, J. Q., Zhou, C. H., Xu, K. Q. and Watanabe, M.: Flood disaster monitoring and  
577 evaluation in China, *Environmental Hazards*, 4, 33-43, 2002.
